# Supplementary material
Source: MDPI journal article supplement (https://www.mdpi.com/2311-7524/9/7/771)
Supplement: s1 [file s1]

**Table S1.** The alteration of total phenolics, DPPH, total monomeric anthocyanin and protein content according to the varieties, drying methods, and their interaction (mean  $\pm$  standard deviation).

| Variety                  |         | Total Phenolics (mg/L GAE) | DPPH (%)           | Total Mono Ant   | Protein (mg/ml)  |
|--------------------------|---------|----------------------------|--------------------|------------------|------------------|
|                          | Deyvani | 104.30 $\pm$ 45.44a        | 0.69 $\pm$ 0.05c   | 4.55 $\pm$ 3.51a | 1.23 $\pm$ 0.64b |
|                          | Haseni  | 90.46 $\pm$ 10.44b         | 0.83 $\pm$ 0.08a   | 4.22 $\pm$ 1.88b | 1.07 $\pm$ 0.22c |
|                          | Reşek   | 82.29 $\pm$ 7.74c          | 0.75 $\pm$ 0.08b   | 4.72 $\pm$ 1.43a | 2.49 $\pm$ 1.35a |
| Drying method            |         |                            |                    |                  |                  |
|                          | AOW     | 80.43 $\pm$ 8.36b          | 0.78 $\pm$ 0.11a   | 4.81 $\pm$ 1.46b | 1.18 $\pm$ 0.53b |
|                          | POT     | 118.37 $\pm$ 35.41a        | 0.70 $\pm$ 0.05b   | 6.42 $\pm$ 2.31a | 2.47 $\pm$ 1.41a |
|                          | SD      | 78.24 $\pm$ 6.54b          | 0.79 $\pm$ 0.06a   | 2.25 $\pm$ 0.78c | 1.13 $\pm$ 0.28b |
| Variety x Drying method  |         |                            |                    |                  |                  |
| Deyvani                  | AOW     | 77.00 $\pm$ 4.42de         | 0.66 $\pm$ 0.04f   | 3.24 $\pm$ 0.19e | 0.84 $\pm$ 0.05f |
|                          | POT     | 164.34 $\pm$ 9.43a         | 0.68 $\pm$ 0.04ef  | 9.08 $\pm$ 0.52a | 2.08 $\pm$ 0.12b |
|                          | SD      | 71.56 $\pm$ 4.11e          | 0.73 $\pm$ 0.04def | 1.34 $\pm$ 0.08g | 0.77 $\pm$ 0.04f |
| Haseni                   | AOW     | 90.09 $\pm$ 5.17c          | 0.89 $\pm$ 0.05a   | 6.55 $\pm$ 0.38b | 0.81 $\pm$ 0.05f |
|                          | POT     | 101.50 $\pm$ 5.82b         | 0.75 $\pm$ 0.04cde | 3.80 $\pm$ 0.22d | 1.08 $\pm$ 0.06e |
|                          | SD      | 79.78 $\pm$ 4.58de         | 0.84 $\pm$ 0.05ab  | 2.29 $\pm$ 0.13f | 1.31 $\pm$ 0.08d |
| Reşek                    | AOW     | 74.22 $\pm$ 4.26de         | 0.78 $\pm$ 0.04bcd | 4.64 $\pm$ 0.27c | 1.88 $\pm$ 0.11c |
|                          | POT     | 89.27 $\pm$ 5.12c          | 0.66 $\pm$ 0.04f   | 6.38 $\pm$ 0.37b | 4.25 $\pm$ 0.24a |
|                          | SD      | 83.38 $\pm$ 4.78cd         | 0.81 $\pm$ 0.05bc  | 3.13 $\pm$ 0.18e | 1.33 $\pm$ 0.08d |
| ANOVA                    |         |                            |                    |                  |                  |
| FVariety                 |         | 36.58***                   | 22.80***           | 6.98**           | 456.50***        |
| FDrying method           |         | 150.45***                  | 12.03***           | 473.89***        | 435.88***        |
| FVariety x Drying method |         | 66.96***                   | 3.87*              | 184.84***        | 161.76***        |

Different letters in the same column indicate a significant difference between means according to Student's t-test ( $p < 0.05$ ) for each factor. \*, \*\*, and \*\*\* indicate significance at  $p < 0.05$ ,  $p < 0.01$ , and  $p < 0.001$ , respectively. Total Mono Ant: total monomeric anthocyanin.

**Table S2.** Eigenvectors for the studied features.

| Traits                     | PC1    | PC2    | PC3    | PC4    | PC5    | PC6    | PC7    | PC8    | PC9    |
|----------------------------|--------|--------|--------|--------|--------|--------|--------|--------|--------|
| DPPH (%)                   | -0.087 | -0.271 | 0.494  | 0.084  | 0.248  | -0.436 | 0.075  | 0.105  | 0.402  |
| Protein (mg/ml)            | -0.065 | 0.459  | 0.035  | 0.361  | -0.094 | 0.046  | 0.036  | -0.452 | 0.070  |
| Berry Weight (g)           | -0.175 | -0.031 | 0.402  | -0.062 | -0.572 | 0.062  | 0.146  | 0.307  | -0.410 |
| TSS (%)                    | 0.228  | -0.047 | 0.521  | -0.044 | 0.016  | 0.364  | -0.547 | 0.000  | -0.092 |
| pH                         | 0.106  | 0.332  | 0.184  | -0.477 | -0.223 | 0.110  | 0.314  | -0.167 | 0.483  |
| TA                         | -0.088 | -0.357 | 0.276  | 0.302  | 0.219  | 0.425  | 0.455  | -0.067 | 0.135  |
| L                          | -0.117 | 0.142  | 0.230  | -0.467 | 0.531  | 0.061  | -0.063 | -0.335 | -0.331 |
| a                          | 0.409  | -0.034 | -0.068 | 0.059  | -0.012 | 0.328  | -0.026 | -0.009 | 0.178  |
| b                          | 0.424  | -0.011 | -0.029 | 0.012  | 0.000  | 0.078  | 0.087  | 0.071  | -0.037 |
| Chroma                     | 0.420  | -0.011 | -0.043 | 0.019  | 0.015  | 0.181  | 0.063  | 0.126  | 0.039  |
| Hue                        | 0.323  | -0.064 | 0.275  | -0.023 | -0.328 | -0.402 | 0.066  | -0.385 | -0.060 |
| Mono Ant                   | 0.265  | 0.307  | 0.138  | 0.279  | 0.175  | -0.321 | -0.269 | 0.257  | 0.085  |
| Col Den                    | -0.205 | 0.430  | 0.111  | -0.143 | 0.065  | 0.132  | 0.008  | 0.504  | 0.243  |
| Pol Col                    | -0.185 | 0.339  | 0.201  | 0.466  | 0.003  | 0.153  | 0.033  | -0.124 | -0.097 |
| Total Phenolics (mg/L GAE) | 0.314  | 0.236  | 0.066  | 0.020  | 0.283  | -0.150 | 0.522  | 0.202  | -0.427 |

Col Den: color density; Pol Col: polymeric color; TA: titration acidity; Mono Ant: total monomeric anthocyanin;  
TP: total phenolic content; TSS: total soluble solids.
